# Supplementary material for: Assessment of cerebral autoregulation indices – a modelling perspective
Source: PubMed Central journal article supplement (PMC7295753; doi:10.1038/s41598-020-66346-6), 2020-06-15
Supplement: 41598_2020_66346_MOESM1_ESM.pdf [file 41598_2020_66346_MOESM1_ESM.pdf]

## Supporting Information

**Paper title: Assessment of cerebral autoregulation indices – a modelling perspective**

**Xiuyun Liu<sup>1,2\*</sup>, PhD, Marek Czosnyka<sup>1,3</sup>, PhD, Joseph Donnelly<sup>1,4</sup>, PhD, Danilo Cardim<sup>1,5</sup>, PhD, Manuel Cabeleira<sup>1</sup>, MSc, Despina Aphroditi Lalou<sup>1</sup>, MD, Xiao Hu<sup>6</sup>, PhD, Peter J. Hutchinson<sup>1</sup>, PhD, Peter Smielewski<sup>1</sup>, PhD**

**Running title: assessment of cerebral autoregulation**

1. Brain Physics Laboratory, Division of Neurosurgery, Department of Clinical Neurosciences, Addenbrooke's Hospital, University of Cambridge, Cambridge, UK
2. Department of Anesthesiology & Critical Care Medicine, School of Medicine, Johns Hopkins University, Baltimore, MD, USA
3. Institute of Electronic Systems, Warsaw University of Technology, Poland
4. Department of Anaesthesiology, University of Auckland, Auckland, New Zealand
5. Department of Neurology and Neurotherapeutics, University of Texas Southwestern Medical Center, Dallas, TX, USA
6. School of Nursing, Duke University, Durham, NC, USA

### **S1 Tiecks' ARI Model <sup>1</sup>**

The cerebral blood flow velocities in response to different levels of cerebral autoregulation, was evaluated by a second-order linear differential equation (Supplementary equation 1-4)<sup>1</sup>, where C is a constant value, denoting the initial value of ABP. ABP(n) represents mean ABP at time (sample) n and f stands for the sampling frequency of ABP. Tiecks' model separated CA into 10 levels through a set of parameters, which are the value of time constant (tau), damping factor (D), and the autoregulatory dynamic gain (K) (Supplementary Table 1).  $x_1$  and  $x_2$  are intermediate, state variables, which are set to zero at the start of the simulation process.

$$P(n) = ABP(n) - c \quad (1)$$

$$x_1(n) = x_1(n - 1) + \frac{P(n) - x_2(n-1)}{f\tau} \quad (2)$$

$$x_2(n) = x_2(n - 1) + \frac{x_1(n) - 2D \cdot x_2(n-1)}{f\tau} \quad (3)$$

$$V(n) = P(n) - K \cdot x_2(n) \quad (4)$$

**Supplementary Table 1.** Parameters used in Tiecks' model related to different levels of cerebral autoregulation

| tau [s] | D    | K    | ARI | dROR,%/s                          |
|---------|------|------|-----|-----------------------------------|
| ...     | 0.00 | 0    | 0   | 0, Absent autoregulation          |
| 2.00    | 1.60 | 0.20 | 1   | 2.5                               |
| 2.00    | 1.50 | 0.40 | 2   | 5.0                               |
| 2.00    | 1.15 | 0.60 | 3   | 10.0                              |
| 2.00    | 0.90 | 0.80 | 4   | 15.0                              |
| 1.90    | 0.75 | 0.90 | 5   | 20.0, Normal autoregulation       |
| 1.60    | 0.65 | 0.94 | 6   | 30.0                              |
| 1.20    | 0.55 | 0.96 | 7   | 40.0                              |
| 0.87    | 0.52 | 0.97 | 8   | 60.0                              |
| 0.65    | 0.50 | 0.98 | 9   | 80.0 Overly active autoregulation |

tau is time constant, D is damping factor, K is autoregulatory dynamic gain, ARI is autoregulation index, dROR is dynamic rate of regulation according to Aaslid et al

## References

1. Tiecks, F. P., Lam, A. M., Aaslid, R. & Newell, D. W. Comparison of Static and Dynamic Cerebral Autoregulation Measurements. *Stroke* **26**, 1014–1019 (1995).
